# Supplementary material for: Efficient Synthesis of PVDF/PI Side-by-Side Bicomponent Nanofiber Membrane with Enhanced Mechanical Strength and Good Thermal Stability
Source: MDPI journal article supplement (doi:10.3390/nano9010039), 2018-12-29
Supplement: s1 [file s1]

## Efficient Synthesis of PVDF/PI Side-by-Side Bicomponent Nanofiber Membrane with Enhanced Mechanical Strength and Good Thermal Stability

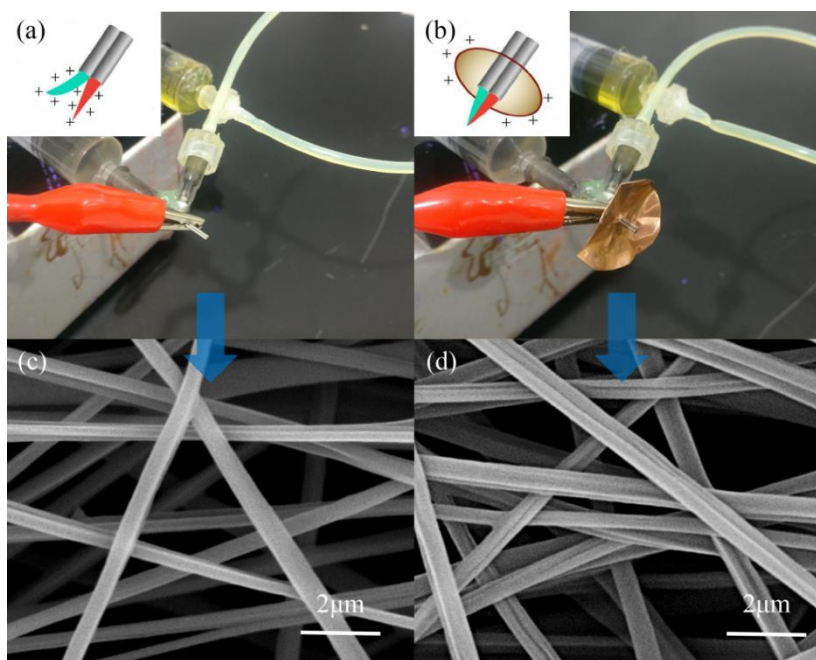

**Figure S1.** The schematic diagram of the electrospinning device before (a) and after (b) improvement; The corresponding SEM images of PVDF/PI side-by-side fibers before (c) and after (d) improvement.

In order to identify the two components in PVDF/PI side-by-side fibers, fluorescent labeling experiment was introduced. Fluorescein (0.5 wt %) was added to the PVDF solution, which shows intense green fluorescence. And Rhodamine B (0.5 wt %) was put into the PI solution that possess strong red fluorescence. In Figure S2, green PVDF and orange PI can be evidently observed under fluorescence microscope.

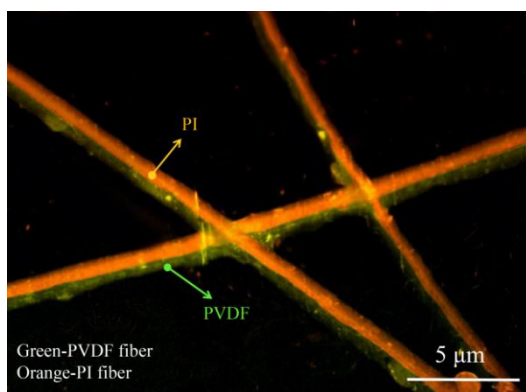

**Figure S2.** Fluorescence microscopy image: green-PVDF fiber, orange-PI fiber.
